# Supplementary material for: Adsorption mechanisms of short-chain and ultrashort-chain PFAS on anion exchange resins and activated carbon
Source: Royal Society of Chemistry journal article supplement (doi:10.1039/d3ew00959a), 2024-01-01
Supplement: d3ew00959a1.pdf [file d3ew00959a1.pdf]

**Supporting Information for**

**Adsorption mechanisms of short-chain and ultrashort-chain PFAS on  
anion exchange resins and activated carbon**

Swadhina P. Lenka<sup>1</sup>, Melanie Kah<sup>2</sup>, Jack L.-Y. Chen<sup>3,4,5</sup>, Bryan Andres Tiban Anrango<sup>3,4</sup>,  
and Lokesh P. Padhye<sup>1\*</sup>

<sup>1</sup>Department of Civil and Environmental Engineering, The University of Auckland,  
Auckland, New Zealand

<sup>2</sup>School of Environment, The University of Auckland, Auckland, New Zealand

<sup>3</sup>School of Science, Auckland University of Technology, New Zealand

<sup>4</sup>The MacDiarmid Institute for Advanced Materials and Nanotechnology, Wellington,  
New Zealand

<sup>5</sup>Department of Biotechnology, Chemistry and Pharmaceutical Sciences, Università degli  
Studi di Siena, Siena, Italy

\*Corresponding Author Contact Email: [l.padhye@auckland.ac.nz](mailto:l.padhye@auckland.ac.nz)

**Figures: 4 (S1-S4)**

**Tables: 1 (S1)**

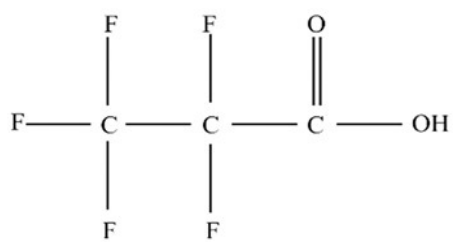

**PFPrA**

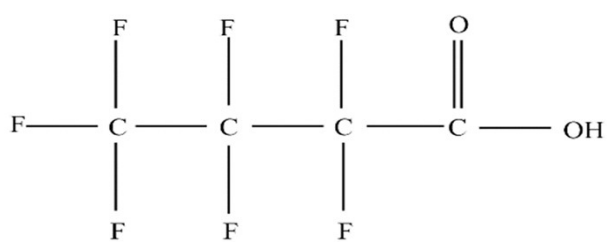

**PFBA**

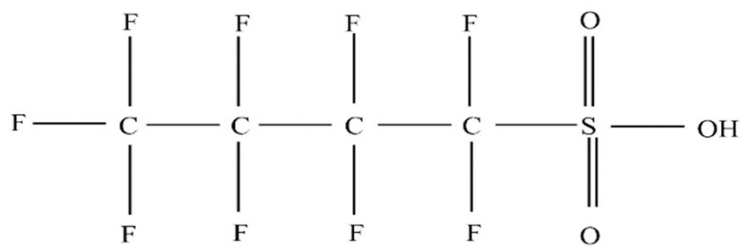

**PFBS**

**Figure S1.** Molecular structures of selected PFAS

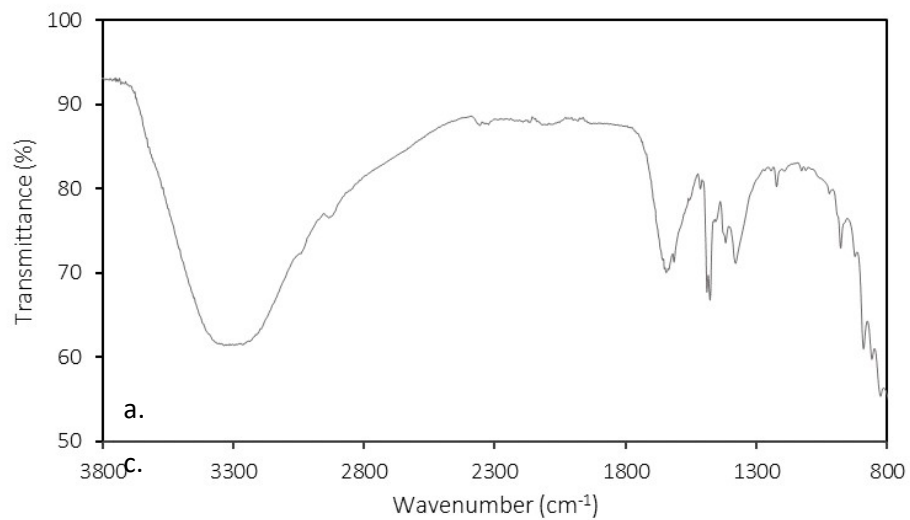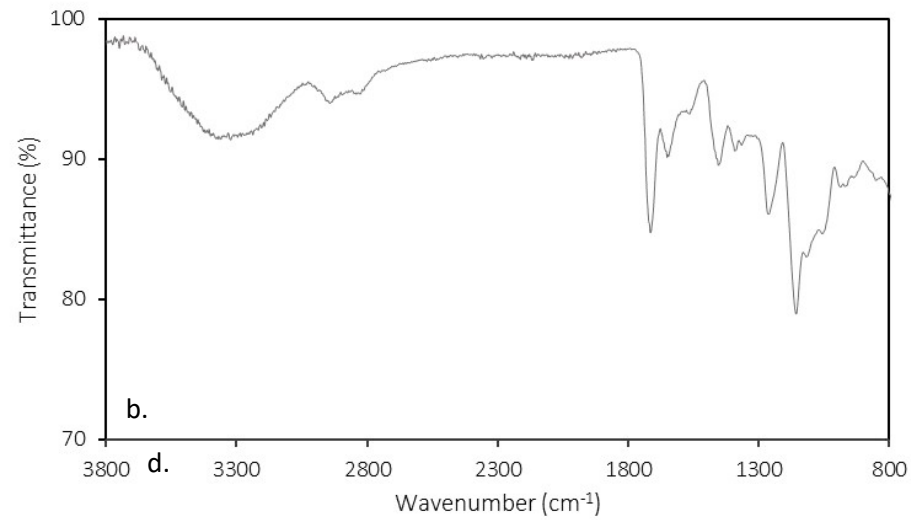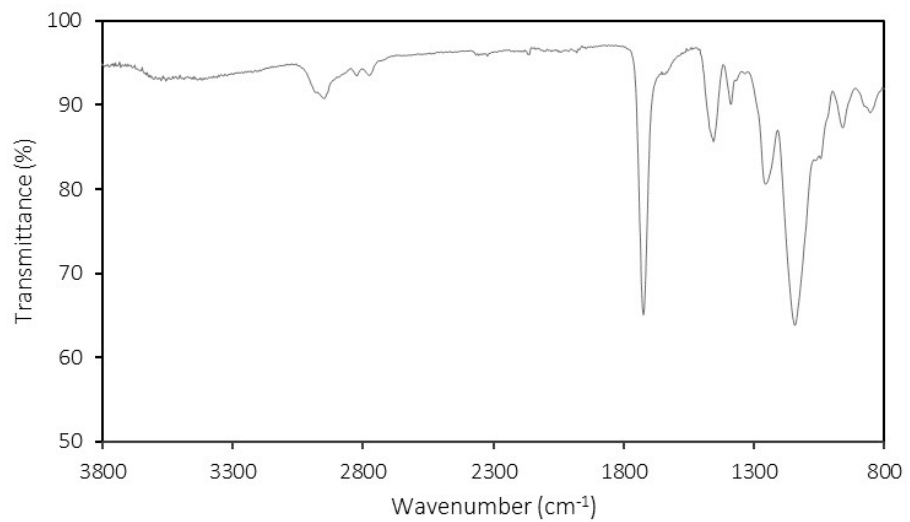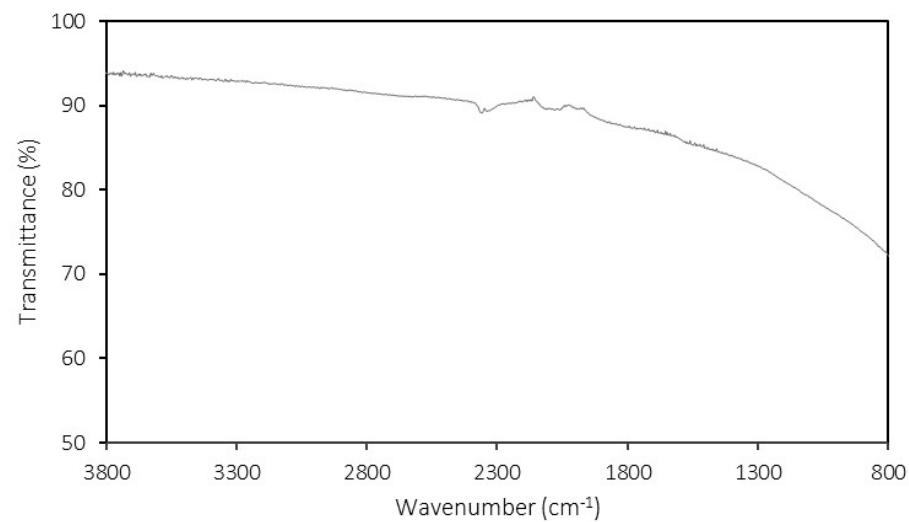

**Figure S2.** FTIR spectra of the adsorbents: a. A900, b. V1, c. V13, and d. AC

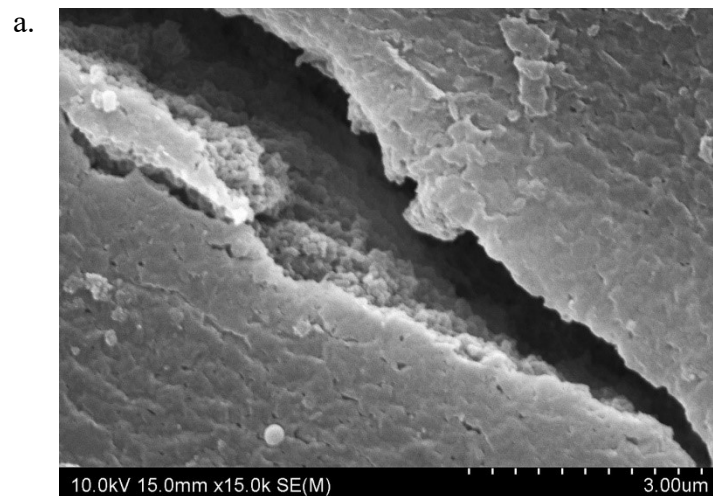

**A900**

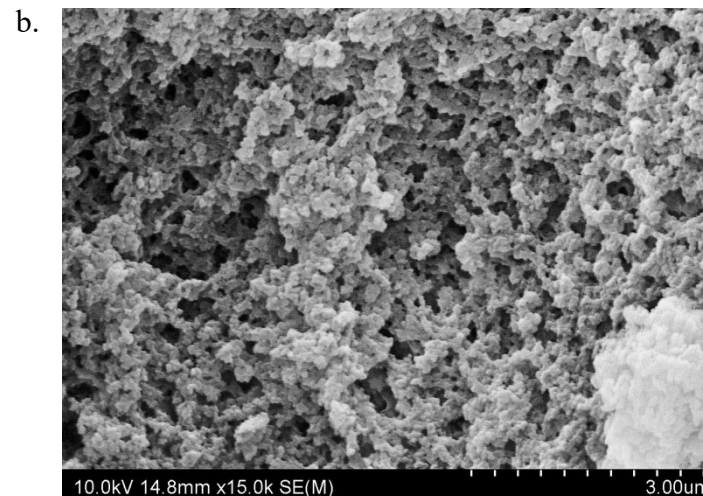

**V1**

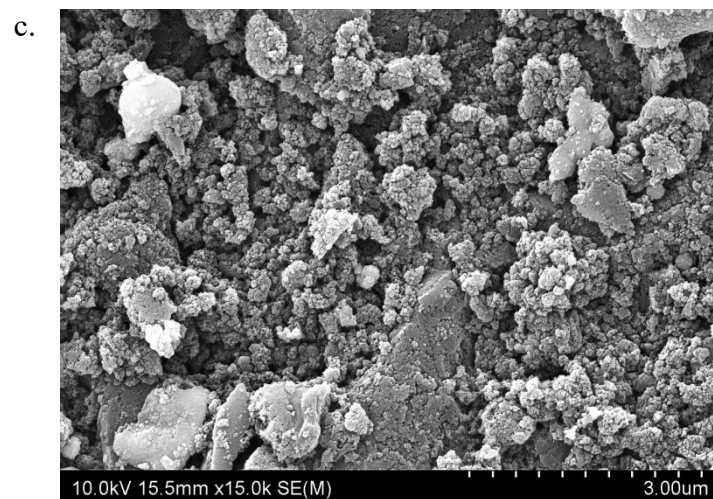

**AC**

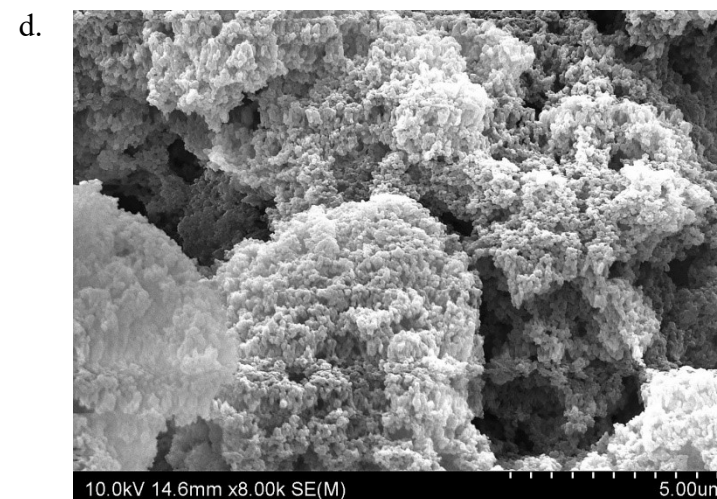

**V13**

**Figure S3.** SEM images of the adsorbents: a. A900, b. V1, c. AC at  $\times 15,000$  and d. V13 at  $\times 8,000$  magnification

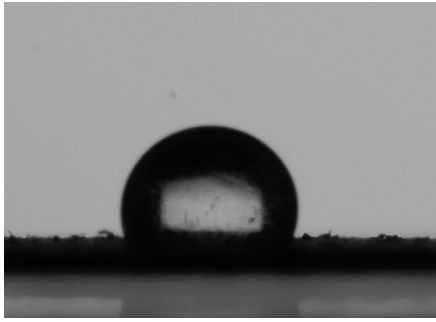

a. A900

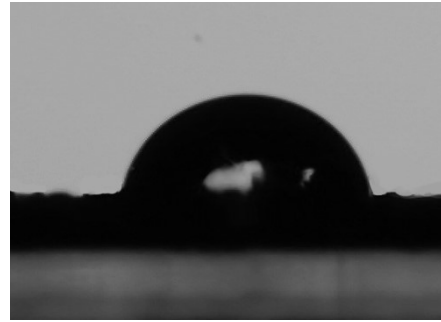

b. AC

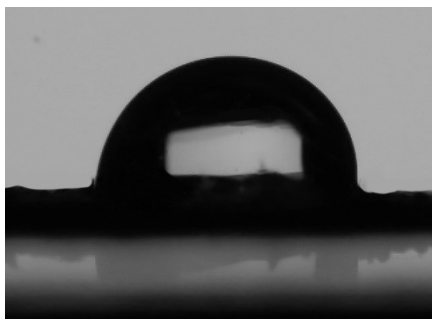

c. V1

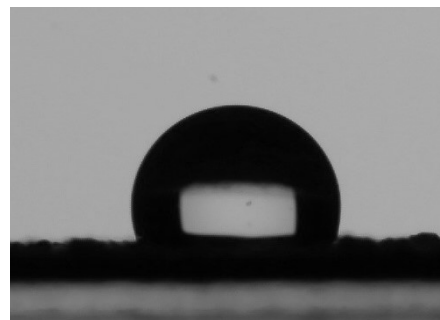

d. V13

**Figure S4.** Contact angle measurements of the adsorbents: a. A900, b. AC, c. V1, d. V13

**Table S1.** Chemical properties of the adsorbents

| Adsorbent | Weight % of elements |      |       |       |
|-----------|----------------------|------|-------|-------|
|           | C                    | N    | H     | S     |
| A900      | 78.05                | 5.04 | 9.545 | 0.46  |
| AC        | 70.2                 | 0.43 | 0.704 | 0.357 |
| V1        | 59.73                | 3.49 | 8.145 | 0.219 |
| V13       | 55.64                | 5.75 | 8.957 | 0.164 |
